# Supplementary material
Source: HighWire-hosted journal article supplement (https://bmjopen.bmj.com/content/10/2/e034076)
Supplement: inline-supplementary-material-1 [file inline-supplementary-material-1.pdf]

List of site codes and open date

| Site                                                             | Site code | Open Date  |
|------------------------------------------------------------------|-----------|------------|
| University Hospitals Coventry and Warwickshire                   | UHCW      | 27/04/2016 |
| The Princess Royal Hospital, Shrewsbury and Telford**            | SHTL      | 10/06/2016 |
| Ninewells Hospital, Dundee                                       | DUND      | 15/06/2016 |
| Norfolk and Norwich University Hospitals***                      | NNUH      | 12/08/2016 |
| University Hospitals Leicester                                   | LEIC      | 20/07/2016 |
| Northern General Hospital, Sheffield                             | NGH       | 26/10/2016 |
| Northumbria Hospital                                             | NORT      | 04/01/2017 |
| Leighton Hospital*                                               | MCHT      | 18/01/2017 |
| Morrison Hospital, Swansea                                       | SWAN      | 04/04/2017 |
| Arrowe Park Hospital                                             | ARRW      | 28/04/2017 |
| Wexham Park Hospital                                             | WEX       | 27/06/2017 |
| Royal Liverpool Hospital****                                     | ROYL      | 17/07/2017 |
| Robert Jones and Agnes Hunt Orthopaedic Hospital                 | RJAH      | 22/08/2017 |
| Doncaster and Bassetlaw Hospital                                 | DONC      | 08/06/2017 |
| Royal Devon and Exeter Hospital                                  | EXET      | 10/01/2018 |
| Musgrove Park Hospital                                           | MUSG      | 15/01/2018 |
| Merthyr Tydfil                                                   | MERT      | 13/02/2018 |
| Basildon University Hospital                                     | BASL      | 05/03/2018 |
| George Eliot Hospital                                            | GEH       | 02/05/2018 |
| North Tees and Hartlepool Hospital                               | TEES      | 19/06/2018 |
| Cardiff and Vale Orthopaedic Centre, Llandough Hospital, Cardiff | CARD      | 03/07/2018 |
| Alexandra Hospital, Redditch                                     | WAH       | 26/11/2018 |
| Wharfedale Hospital, Leeds Community Healthcare                  | LCH       | 29/11/2018 |
| Imperial College London                                          | IMPC      | 19/02/2019 |

\*Closed to recruitment August 2017

\*\*Closed to recruitment September 2018

\*\*\*Closed to recruitment May 2018

\*\*\*\*Closed to recruitment November 2018
