# Supplementary material
Source: HighWire-hosted journal article supplement (https://bmjopen.bmj.com/content/10/2/e034076)
Supplement: inline-supplementary-material-2 [file inline-supplementary-material-2.pdf]

Schedule of enrolment, interventions and assessments.

| <b>Visit Window</b><br>(No. Weeks $\pm$ No. Days) | <b>Baseline</b> | <b>2 wk post randomisation:</b><br>telephone follow up | <b>3 m (<math>\pm</math> 1 m) after randomisation:</b><br>postal follow up | <b>6 m (<math>\pm</math> 1m) after randomisation:</b><br>postal follow up |
|---------------------------------------------------|-----------------|--------------------------------------------------------|----------------------------------------------------------------------------|---------------------------------------------------------------------------|
| Eligibility screen                                | ✓               |                                                        |                                                                            |                                                                           |
| Written informed consent                          | ✓               |                                                        |                                                                            |                                                                           |
| Baseline data Form                                | ✓               |                                                        |                                                                            |                                                                           |
| Randomisation                                     | ✓               |                                                        |                                                                            |                                                                           |
| Intervention delivery                             | ✓               |                                                        |                                                                            |                                                                           |
| Pain score                                        | ✓               | ✓                                                      | ✓                                                                          | ✓                                                                         |
| VISA-A                                            | ✓               |                                                        | ✓                                                                          | ✓                                                                         |
| EQ5D-5L                                           | ✓               |                                                        | ✓                                                                          | ✓                                                                         |
| Adverse events                                    | ✓               | ✓                                                      | ✓                                                                          | ✓                                                                         |
